**Title:** Multiday cycles of heart rate modulate seizure likelihood at daily, weekly and monthly timescales: An observational cohort study

**Authors:** Philippa J. Karoly<sup>1,2,3,\*</sup>, Rachel E. Stirling<sup>1,\*</sup>, Dean R. Freestone<sup>4</sup>, Ewan S. Nurse<sup>3,4</sup>, Brendan Doyle<sup>4</sup>, Amy Halliday<sup>3</sup>, Andrew Neal<sup>3</sup>, Wenjuan Xiong<sup>5</sup>, Tatiana Kameneva<sup>1,5</sup>, Nicholas M. Gregg<sup>6</sup>, Benjamin Brinkmann<sup>6</sup>, Mark P. Richardson<sup>7</sup>, Sonya B. Dumanis<sup>8</sup>, Andre La Gerche<sup>9</sup>, David B. Grayden<sup>1,2,3</sup>, Wendyl D'Souza<sup>3</sup>, Mark J. Cook<sup>2,3</sup>

\*authors contributed equally to this paper

### **Affiliations**

1. Department of Biomedical Engineering, The University of Melbourne
2. Graeme Clark Institute for Biomedical Engineering, The University of Melbourne
3. Departments of Medicine and Neurology, The University of Melbourne, St Vincent's Hospital, Melbourne
4. Seer Medical, Australia
5. Faculty of Science Engineering and Technology, Swinburne University of Technology
6. Bioelectronics Neurophysiology and Engineering Lab, Department of Neurology, Mayo Clinic, Rochester, MN
7. Division of Neuroscience, King's College London, London, UK
8. Epilepsy Foundation, Landover, Maryland
9. Sports Cardiology Laboratory, Baker Heart & Diabetes Institute, Melbourne, Australia

### **Corresponding author**

Professor Mark Cook, St Vincent's Hospital, The University of Melbourne, 41 Victoria Parade, Fitzroy VIC 3065 Australia. [markcook@unimelb.edu.au](mailto:markcook@unimelb.edu.au)

## Abstract

Circadian and multiday rhythms are found across many biological systems, including cardiology, endocrinology, neurology and immunology. In people with epilepsy, epileptic brain activity and seizure occurrence have been found to follow circadian, weekly and monthly rhythms.

Understanding the relationship between these cycles of brain excitability and other physiological phenomena can provide new insight into the causes of multiday cycles. The brain-heart link is highly relevant for epilepsy, with implications for seizure prediction, therapy (i.e. vagal nerve stimulation) and mortality (i.e. sudden unexpected death in epilepsy).

We report the results from a non-interventional, observational cohort study, Tracking Seizure Cycles. This study quantified multiday cycles of heart rate and seizures in human participants (N=26) using wearable smartwatches and mobile seizure diaries over at least two months (M=6.4, SD=4.0). Participants had an epilepsy diagnosis and uncontrolled or partially controlled seizures. Significant cycles in heart rate were detected using a continuous wavelet transform. Significant co-modulation between heart rate cycles and seizure occurrence were measured from the distributions of seizure likelihood with respect to underlying cycle phase (Omnibus test). Weekly trends were also investigated from a retrospective cohort of continuous video-EEG-ECG records of people (N=29) undergoing diagnostic epilepsy monitoring for at least eight days (M=9.7, SD=1.3).

Heart rate cycles were found in all participants, with circadian (100%), about-weekly (88%) and about-monthly (92%) rhythms being the most prevalent. Seizures were significantly locked onto at least one heart rate cycle in 76% of eligible participants. Seizures occurred preferentially during the rising phase of the heart rate cycles. Significant weekly trends were also verified in 52% of the video-EEG-ECG cohort.

The existence and prevalence of multiday heart rate cycles may have clinical implications for cardiology. Heart rate cycles showed striking similarities to multiday epileptic rhythms and were co-modulated with seizure likelihood. The relationship between heart rate and seizures is relevant for epilepsy therapy, including seizure forecasting. More broadly, understanding the link between multiday cycles in the heart and brain can shed new light on endogenous physiological rhythms in humans.

## Introduction

Cyclic phenomena are ubiquitous in biological systems. In the field of chronobiology, circadian rhythms (and related 24-hour rhythms) have been widely studied. However, other timescales, including weekly (circaseptan), monthly (circalunar or circatringian), seasonal (circannual) and even longer rhythms have also been observed across a diverse range of physiological functions.<sup>1-5</sup> In neurology, huge strides have been made in chronic brain recording devices, leading to overwhelming evidence that multiday cycles govern brain excitability in people with epilepsy<sup>4-6</sup>.

The phenomena of multiday cycles in epilepsy were identified through observation of individuals' seizure patterns.<sup>7</sup> Subsequent studies using chronic electroencephalography (EEG) have shown that periodicity of seizure occurrence is underpinned by individual circadian and multiday (5-30 day) rhythms of epileptic activity<sup>5,8</sup> and brain excitability<sup>6</sup> in humans and other mammals.<sup>9,10</sup> Importantly, multiday cycles in epilepsy exist for most people,<sup>4-6</sup> and appear to be 'free-running' in the sense that they are not tied to environmental cues (weekday, lunar cycle, calendar), are equally prevalent in men and women<sup>4,5,7</sup> and are observed across epilepsy syndromes and seizure types.<sup>4</sup>

Although multiday cycles of brain activity have been predominantly investigated in people with epilepsy, it is unlikely that these slower rhythms are limited to epilepsy. Other episodic psychiatric conditions are suggestive of multiday modulation, including bipolar disorder,<sup>11</sup> depression<sup>12</sup> and other psychopathologies.<sup>13</sup> Aside from neurology, multiday cycles are recognised in cardiology<sup>1,2</sup> and immunology.<sup>3</sup> Therefore, we hypothesise that free-running multiday rhythms are widespread across major organ systems, analogous to circadian rhythms. However, identifying systemic, multiday oscillatory biomarkers has been limited by availability of chronic recording capabilities.

Of the wider physiological systems, long-term cardiac monitoring is more accessible than other physiological monitoring pertinent to multiday cycles. Indeed, chronobiology has a long history in cardiology and the aetiology of heart disease. In addition to well documented circadian rhythms of cardiac electrophysiology and arrhythmias,<sup>14</sup> some studies have also identified intrinsic multiday cycles of cardiac output.<sup>15-17</sup> These studies suggest that longer rhythms also drive cardiac activity, which may be linked to aforementioned multiday rhythms in the brain.

Brain-heart dynamics have long been of interest in epilepsy research and clinical management. Epileptic seizures can cause functional changes in the autonomic nervous system, often detected as acute changes in heart rate (tachycardia, bradycardia) or HRV near the onset or offset of seizures.<sup>18</sup> Pre-ictal changes in heart rate and HRV have been identified as potential triggers or predictors of impending seizures.<sup>19</sup> Furthermore, the therapeutic use of vagus nerve stimulation (VNS) in epilepsy suggests a relationship between cardiac and cortical excitation, with VNS leading to substantial reductions in seizure frequency for some patients.<sup>20</sup> The mechanisms of

action for VNS are not well understood and may be mediated by different brain regions or through more generalised reduction in brain excitability.<sup>21</sup>

Understanding the relationship between the brain and heart at slower timescales (i.e., weekly, monthly or seasonal) can provide new insight into causes of multiday physiological cycles with potential implications for cardiac arrhythmogenesis<sup>22</sup>. If cardiac electrophysiology shows multiday rhythms akin to cycles of brain excitability, this will provide a new avenue to monitor aspects of neurological diseases. Similarly, characterising slow changes in cardiac activity may be important for treating heart conditions. This study aimed to 1) establish the existence and prevalence of multiday cycles of heart rate, and 2) determine whether there are associations between heart rate cycles and seizure likelihood in humans.

## **Methods**

Cardiac signals and seizures were monitored in an observational cohort study ('Tracking Seizure Cycles') using long-term mobile seizure diaries and a smartwatch. Cardiac and epileptic activity were also investigated using a retrospective dataset of one-week recordings from ambulatory video-EEG-ECG for epilepsy diagnostic testing. These two datasets provided important complementary information. Seizure diaries provide an approximation of underlying cycles of epileptic activity compared to EEG<sup>23</sup> and wearable devices for heart rate monitoring have lower resolution than ECG. However, these limitations are somewhat overcome by the ability to collect long-term recordings over months to years. On the other hand, ambulatory video-EEG-ECG enables accurate quantification of both heart rate and rates of epileptic activity and seizures but have limited recording durations (typically 7-14 days).

### Tracking Seizure Cycles

Tracking Seizure Cycles is a non-interventional cohort study to measure cycles of seizure likelihood from seizure diaries, identify corresponding cycles from non-invasively measured physiological signals and quantify the relationship between physiological cycles and seizure occurrence. The study was approved by the St Vincent's Hospital Human Research Ethics Committee (HREC 009.19) and first enrolment was in August 2019. Participants were over 18 with a confirmed epilepsy diagnosis and uncontrolled or partially controlled seizures. All participants provided written informed consent. Here, we report on one-year study outcomes.

Continuous data were collected via mobile and wearable devices for at least two months and up to two years. Participants wore a smartwatch (Fitbit) and manually reported seizure times in a freely available mobile diary app (Seer App). The smartwatch continuously measured participants' heart rates (via photoplethysmography) at 5s resolution.

There were 46 participants (29 female) with a cumulative total of 143,142 hours (19,880 hours per person, mean  $M = 3,491$ , standard deviation  $SD = 2,880$ ) of continuous heart rate recorded. Mean device adherence (at least one recording every hour) among participants was 66% ( $SD = 36\%$ ). The total diary duration across participants was 53 years (193,429 days per person,  $M = 464$ ,  $SD = 543$ ). Participant diaries included over 2,974 seizures ( $M = 71$ ,  $SD = 80$ ) with 1,818 seizures ( $M = 44$ ,  $SD = 70$ ) reported during the wearable monitoring period.

### *Multiday heart rate cycles*

To evaluate the strength of heart rate cycles, participants were required to have at least two months of recordings with over 80% adherence (i.e., less than 20% missing data), with adherence defined as at least one heart rate recording every hour. Eligible participant demographics are given in Table 1 and Supplementary Table 1.

Cycles were measured at different periods using a wavelet transform approach that was previously proposed for the detection of multiday cycles of epileptic activity.<sup>5</sup> The continuous heart rate signal was first down-sampled to one timestamp every minute. Linear interpolation was performed for up to 1 hour either side of a missing segment. Longer recording gaps of up to 3 days were interpolated with a straight line at the average value of all the data (see Appendix 1).

Candidate cycle periods were then tested using a continuous Morlet wavelet transform, where significant peaks in the global wavelet power were determined to be significant heart rate cycle periods (see Appendix 1). Heart rate cycle periods were considered to be circadian, weekly or monthly if they were within  $\pm 33.3\%$  of 24 hours, 7 days or 30 days, respectively (consistent with the approach used by Baud et al.<sup>5</sup>). However, all circadian cycles were detected at exactly 24 hours. Multiday cycles were any other periods longer than 32 hours and ultradian cycles were any other periods shorter than 16 hours.

### *Relationship between seizures and heart rate cycles*

To evaluate the strength of co-modulation between seizure occurrence and heart rate cycles, participants were required to have at least five reported seizures (see Table 1). Co-modulation was measured from the degree of ‘phase-locking’ of seizure times with respect to underlying heart rate cycles, i.e. how tightly seizure times were linked a particular point (phase) of the cycle. Phase-locking was quantified by the synchronisation index (SI, also known as a phase-locking value or R-value). The amplitude of SI ranges from 0 to 1, where 0 indicates a uniform distribution (i.e., no relationship) and 1 indicates perfect alignment with respect to an underlying cycle. The angle or direction of SI indicates the preferred phase of seizure occurrence; for instance, seizures could be more likely near the peak or trough of average heart rate cycles.

To extract heart rate cycles, the standardised heart rate signal was bandpass filtered into distinct component frequencies matching the significant cycle frequencies (identified from wavelet

decomposition). The bandpass filter applied at each significant cycle was a second-order zero-phase Butterworth bandpass filter with cut-off frequencies at  $\pm 33.3\%$  of the cycle frequency. For instance, someone with significant cycles (wavelet spectrum peaks) at 24 hours, 9 days and 30 days would have three bandpass filters applied with cut-off frequencies of 16-32 hours, 6-12 days and 20-40 days, respectively. These cut-off frequencies were chosen to account for phase shifts in the cycle over the recording time.

The continuous phase of each bandpass filtered signal was estimated using the Hilbert transform. The times of seizure occurrence were mapped to the estimated phase of heart rate cycles. Seizure phases were then binned into 24 (circadian cycles) or 18 (all other periods) equal sized bins (ranging from 0 to  $2\pi$ ) to produce a phase distribution. The SI values (amplitude and angle) were computed from these phase distributions. The Omnibus (also called Hodges-Ajne) test was used to determine whether seizures were significantly ( $p < 0.05$ ) phase-locked to the heart rate cycle by testing the null hypothesis that the phase distribution was uniform.

### Ambulatory video-EEG-ECG analysis

Retrospective analysis of ECG used a separate cohort of people undergoing at-home, ambulatory video-EEG-ECG diagnostic testing for epilepsy (Seer Medical). The study was approved by the St Vincent's Hospital Human Research Ethics Committee (LRR 165/19). All participants provided written informed consent for their de-identified data to be used for subsequent research. This study included 29 participants' records of at least 8 days ( $M = 9.7$  days,  $SD = 1.3$  days) duration. Note that as participants were undergoing diagnostic monitoring, they did not necessarily have an epilepsy diagnosis. Participant demographics and AEDs (if used) are given in Supplementary Table 2.

The current study analysed continuous ECG data, combined with epileptic event labels derived from video-EEG. To derive heart rate from ECG recordings, r-peak detection was performed and the number of beats per minute was computed with a 5 s sliding window. The peak-to-peak intervals (RR interval) were also analysed. Epileptic events were labelled using computer-assisted review, whereby event detection was first performed by a machine learning algorithm and then suspected events were reviewed and confirmed by expert neurophysiology and neurology review (see Appendix 3).

Given the limited duration of ECG studies it was not possible to determine whether weekly cycles were present. Instead, significant linear or quadratic trends were identified in the smoothed heart rate or RR interval signals. Heart rate and RR interval were smoothed using a 1-day moving average filter. Linear regression was then performed for a simple linear and quadratic model (see Appendix 3). The rationale for this approach was that the ECG might be recorded around the peak or trough of an about-weekly cycle (showing a curved or quadratic trend) or on the rising/falling slope of a cycle (showing a linear increase/decrease).

## Results

### Tracking seizure cycles

There were 26 out of 39 participants with at least two months of data (range 2.1-13.9 months,  $M = 6.4$ ,  $SD = 4.0$ ) and at least 80% ( $M = 95\%$ ,  $SD = 5\%$ ) adherence. Among these 26 participants (Table 1), 17 had recorded at least 5 seizures during the wearable recording time and, therefore, were eligible for further seizure analysis.

**Table 1. Demographics of eligible participants in Tracking Seizure Cycles cohort.**

| Participant | Gender | Epilepsy Type | Seizures (recording period) | Recording length (months) | Adherence (%) | Average heart rate (BPM) |
|-------------|--------|---------------|-----------------------------|---------------------------|---------------|--------------------------|
| P1          | M      | Focal         | 17                          | 4.4                       | 99.7          | 69                       |
| P3          | M      | Focal         | 93                          | 5.9                       | 95.0          | 66                       |
| P4          | M      | Focal         | 19                          | 3.7                       | 88.5          | 76                       |
| P5          | F      | Focal         | 7                           | 12.3                      | 90.7          | 81                       |
| P8          | F      | Focal         | 11                          | 11.6                      | 99.2          | 78                       |
| P9          | M      | Focal         | 16                          | 11.3                      | 99.1          | 75                       |
| P11         | M      | Both          | 209                         | 11.9                      | 98.5          | 63                       |
| P13         | F      | Focal         | 5                           | 9.0                       | 81.3          | 75                       |
| P14         | F      | Both          | 0                           | 4.2                       | 98.8          | 63                       |
| P16         | F      | Gen           | 24                          | 12.0                      | 33.4          | 71                       |
| P19         | F      | Gen           | 112                         | 2.8                       | 66.8          | 84                       |
| P21         | F      | Focal         | 2                           | 2.7                       | 93.1          | 70                       |
| P22         | F      | Focal         | 1                           | 4.2                       | 66.5          | 79                       |
| P23         | F      | Focal         | 104                         | 10.4                      | 82.0          | 88                       |
| P24         | M      | Gen           | 4                           | 12.3                      | 42.9          | 65                       |
| P25         | F      | Gen           | 19                          | 10.3                      | 99.00         | 70                       |
| P26         | F      | Focal         | 180                         | 12.3                      | 46.0          | 90                       |
| P29         | F      | Focal         | 4                           | 5.7                       | 96.9          | 63                       |
| P31         | M      | Focal         | 67                          | 5.5                       | 94.7          | 79                       |
| P32         | F      | Focal         | 5                           | 7.8                       | 57.8          | 75                       |
| P34         | F      | Focal         | 54                          | 13.3                      | 66.1          | 92                       |
| P35         | F      | Both          | 313                         | 13.3                      | 98.6          | 73                       |
| P36         | M      | Both          | 20                          | 5.7                       | 66.5          | 85                       |
| P38         | F      | Focal         | 53                          | 7.6                       | 98.9          | 94                       |
| P39         | F      | Focal         | 30                          | 7.3                       | 94.9          | 90                       |
| P40         | F      | Gen           | 0                           | 3.7                       | 96.7          | 70                       |

### Heart rate shows daily, weekly and monthly cycles

We first investigated whether multiday cycles of average heart rate existed. Figure 1 shows an example of heart rate cycles for two people. Multiday rhythms of heart rate were evident over about-weekly (Fig 1e) and about-fortnightly (Fig 1b) periods. Wavelet analysis confirmed significant cycles at daily (24 h), fortnightly (15 d) and monthly (27 d) periods for P39 (Fig 1c), and daily (24 h), weekly (8.5 d) and slower (43.5 d) periods for P11 (Fig 1f). These examples

provide striking evidence that multiday cycles of cardiac activity exist over weekly and monthly timescales. Cycles can be seen from visual inspection of average heart rate and were robust over months (Fig 1a,d).

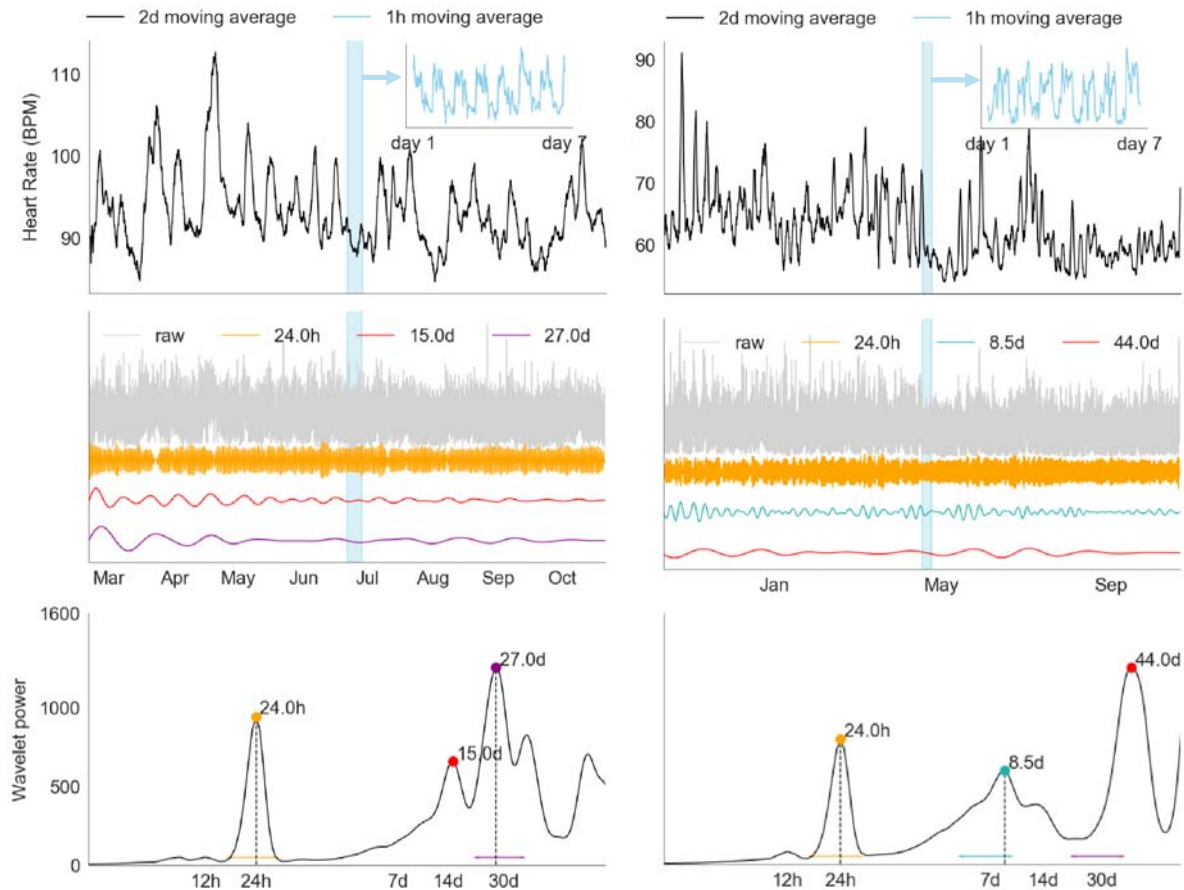

**Figure 1. Examples of multiday heart rate cycles.** Data are shown for two different participants, P39 (a-c) and P11 (d-f). **a,d:** Heart rate (y-axis) smoothed with a 2-day moving average filter shows multiday cycles. Insets (blue) show circadian rhythms of heart rate. **b,e:** Bandpass filtered heart rate signals for different cycles (corresponding respectively to panels c,f). **c,f:** Wavelet power spectra for different scales (x-axis). Significant cycle periods are labelled.

Figure 2 shows the prevalence of multiday heart rate cycles across the cohort. It can be seen that cycles exist at weekly, fortnightly, monthly and longer timescales. Unsurprisingly, the average cycle strength across the cohort (Fig 2a) showed a clear peak at 24 hours, with significant circadian cycles detected for 100% of the cohort. More interesting were peaks in cycle strength around 7 days and 30 days, demonstrating that subsets of people have similar heart rate cycles at these periods (see Supplementary Figure 2 for individual analyses). Notably, multiday heart rate cycles were as prevalent as circadian cycles. We found that 23 people (88%) showed an about-weekly cycle and 24 people (92%) had about-monthly cycles. Apart from these periods, 26



people (100%) had a multiday cycle ( $> 32$  hours) other than weekly or monthly and 19 people (73%) had a shorter ultradian cycle ( $< 16$  hours).

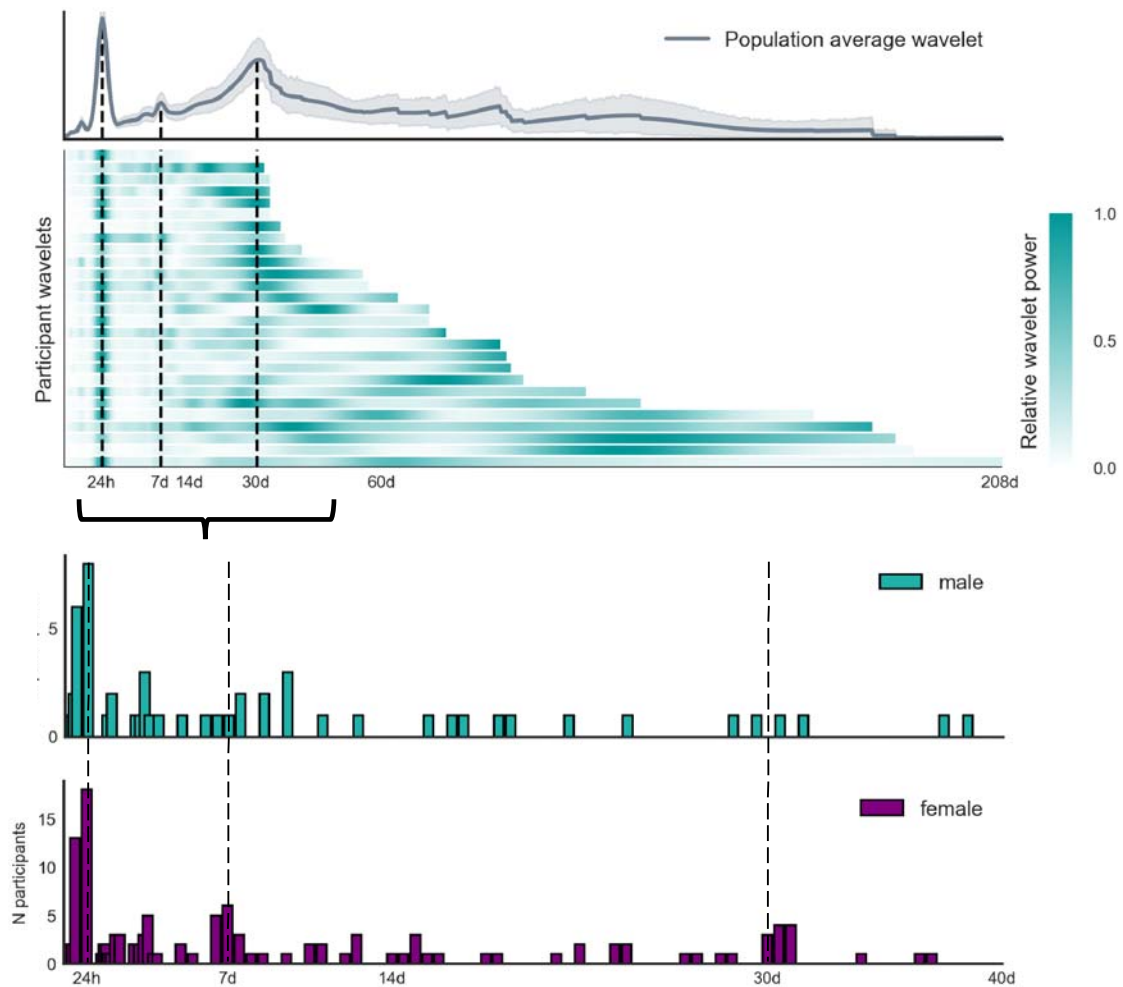

**Figure 2. Distribution of heart rate cycles.** *a:* Cycle strength (expressed as the normalised wavelet power, y-axis) for different periods (x-axis, logarithmic scale) averaged across the cohort. *b:* Raster plot showing cycle strength (colour bar) for each individual (y-axis) at different periods (logarithmic scale). *c,d:* Number of people (y-axis) with significant cycles at different periods up to 40 days (x-axis, logarithmic scale) for men and women, respectively. Note that the *c,d* x-axis (up to 40 days) is a subset of the *a,b* x-axis (up to 208 days) as indicated by the brace.

The distributions of cycles were similar for men and women (Fig 2c and d). Everyone showed daily cycles, and most showed about-weekly cycles. Of the people with about-monthly cycles, five were men (62% of all eligible male participants) and 16 were women (94% of females). Note that only seven (27%) of the about-weekly cycles were found at precisely 7 days, suggesting that, in general, cycles were not related to a particular day of the week. Three of these

seven people (12% of total cohort) had seizures significantly locked to their 7-day heart rate cycle. Interestingly, this was consistent with a previous finding that 21% of people have a precise 7-day seizure cycle.<sup>4</sup> None of the about-monthly cycles were found at 29.5 days (the lunar period).

#### Multiday heart rate cycles modulate seizure risk

We investigated whether multiday heart rate cycles and seizure likelihood were comodulated by analysing whether self-reported seizure times were significantly phase-locked to the underlying heart rate cycles (quantified by SI).

Individuals with more than five seizures were included in the analysis, resulting in a total of 17 (7 male). Of these, 13 of 17 (76%) had seizures significantly locked onto at least one heart rate cycle. Among participants with observed seizure modulation, 69% (9 of 13) had both fast (circadian or ultradian) and multiday cycles comodulated with seizure likelihood, 77% (10 of 13) had seizures significantly locked onto a multiday cycle and 92% (12 of 13) had seizures significantly locked onto a circadian or ultradian cycle. Of the total cohort of eligible participants, 65% had seizures significantly locked onto a circadian cycle, 35% had seizures significantly locked onto a weekly cycle and 29% had seizures significantly locked onto a monthly cycle.

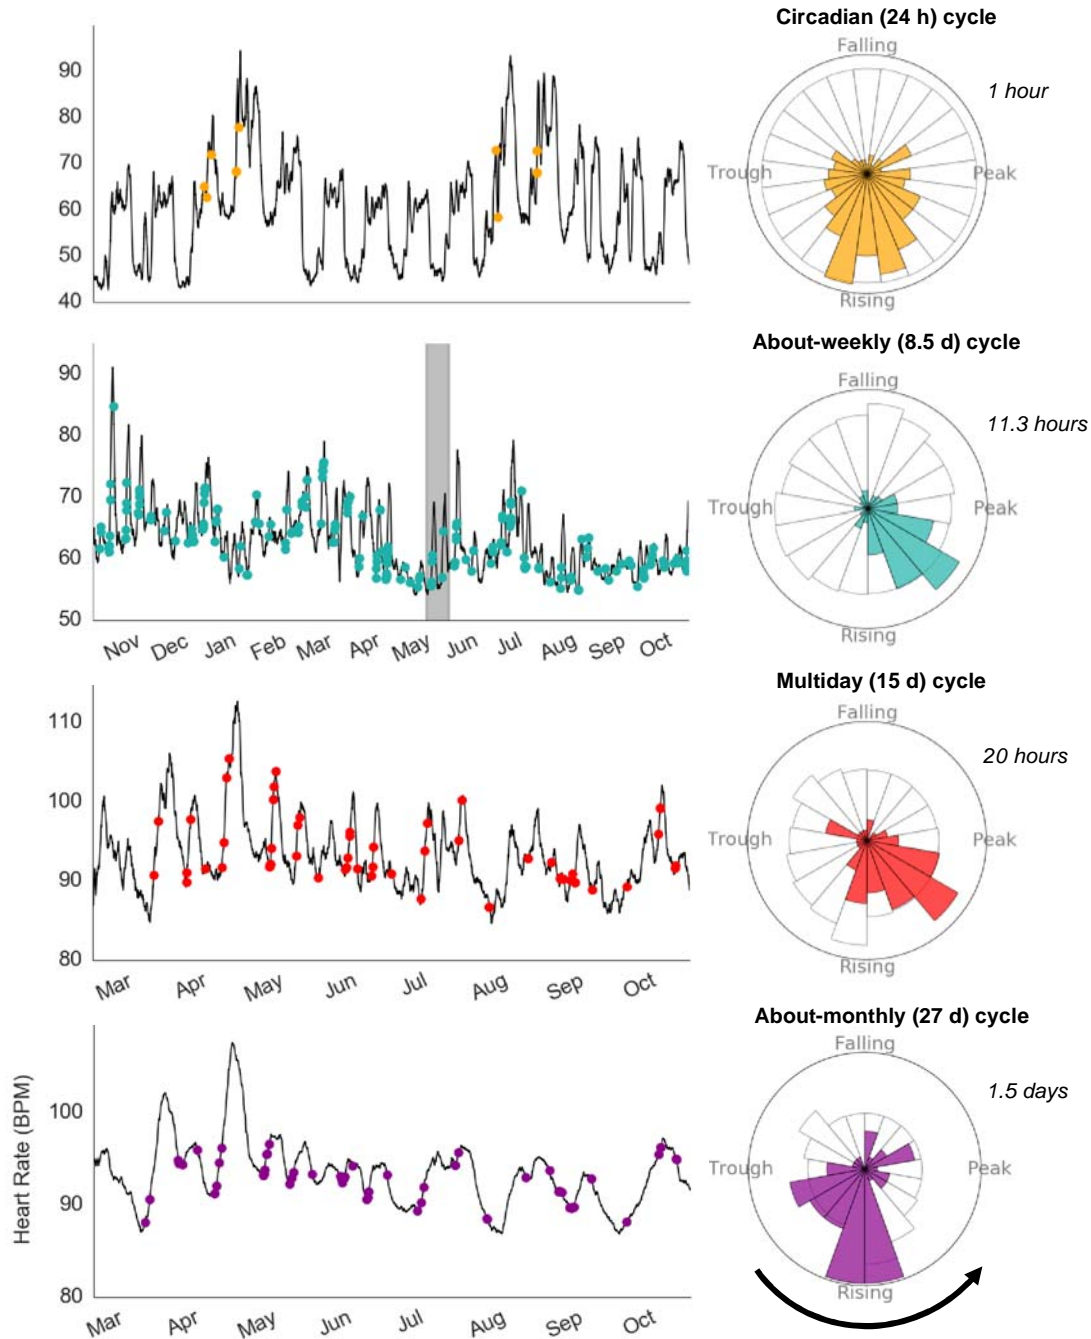

**Figure 3. Examples of seizure occurrences locked to heart rate cycles.** Heart rate (y-axis) and self-reported seizures (dots) for two participants, **a,c**: P11 and **e,g**: P39. **b,d,f,h**: Corresponding circular histograms showing the phase distributions of seizures with respect to significant heart rate cycles. Note that multiday histogram bins have the same phase width ( $2\pi/18$ ) although these correspond to different durations (labelled). The circadian histogram (b) bins have width of 1 hour ( $2\pi/24$ ). Heart rate is shown after applying a moving average filter to highlight cycles (**a** uses a 1-hour MA, **c,e** use a 2-day MA and **g** uses a 7-day MA).

Figure 3 shows individual examples of the occurrences of seizures with respect to multiday cycles of heart rate. Different participants' seizures were strongly synchronised with their unique multiday heart rate cycle. Synchronisation may be stronger for multiday cycles than circadian cycles; for instance, P11 showed  $SI = 0.55$  for their 8.5 day cycle and  $SI = 0.40$  for their circadian cycle.

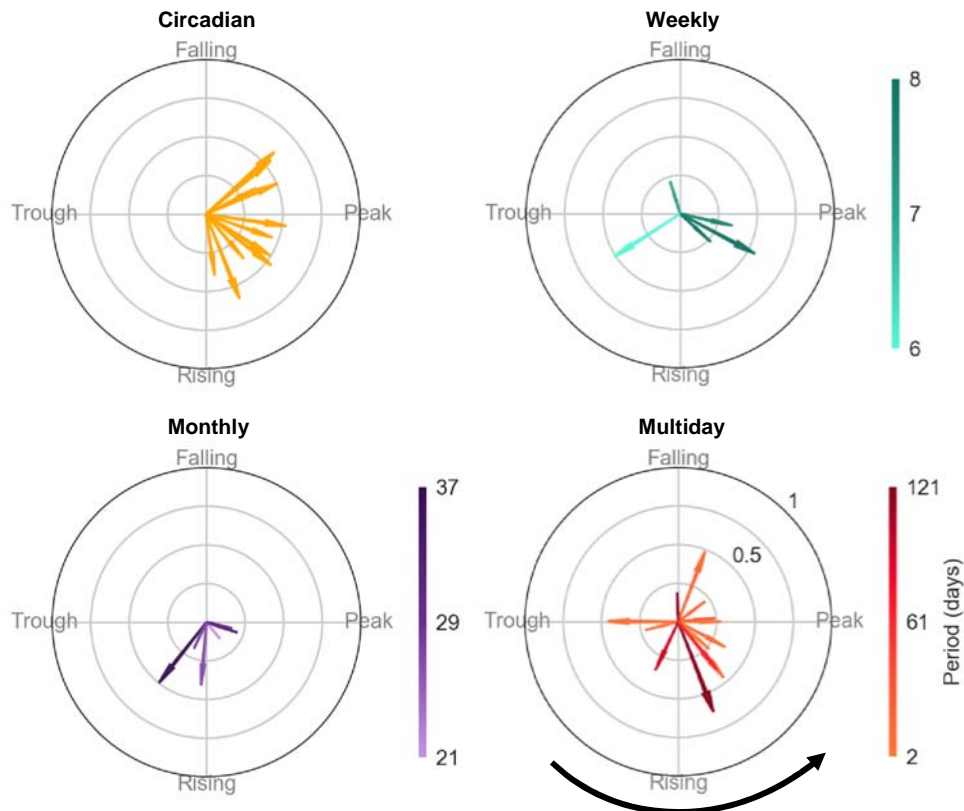

**Figure 4. Phase locking of seizures to heart rate cycles.** Each subplot shows individuals (arrows) with significant phase locking of seizure occurrence to their heart rate cycle. The lengths of the arrows indicate the strength of phase locking (radial axis, between 0 and 1), while the direction indicates the preferred phase (polar axis). **a:** Circadian cycle, all periods were 24 hours. **b:** About-weekly cycle, 6-8 day periods (colour bar). **c:** About-monthly cycle, 21-37 day periods (colour bar). **d:** Multiday cycle, 2-121 day periods (colour bar).

Figure 4 shows the SI vectors (magnitude and preferred phase) for every participant with significant seizure phase locking across different heart rate cycles. It can clearly be seen that seizures preferentially occurred on the rising phase of multiday cycles (weekly, monthly and other multiday periods, Figs 4b-d) for most people. In other words, increasing heart rate was linked to increased seizure likelihood.

For circadian cycles, phase locking was also compared to clock time (Supplementary Figure 3), and a similar distribution was found. Across the cohort, 74% of seizures were reported during the day (between 8AM and 8PM), suggestive of a reporting bias that could affect phase locking of

self-reported events to circadian cycles. However, it is important to note that a diurnal reporting bias would not affect phase-locking to multiday cycles.

### Circadian cycles and weekly trends in continuous video-EEG-ECG

We investigated weekly modulation of heart rate and the cyclic co-modulation of heart rate and epileptic activity using continuous video-EEG-ECG records from a cohort of people undergoing diagnostic monitoring for epilepsy. Figure 5 shows example studies where significant weekly trends were observed in either heart rate or RR interval signals measured from continuous ECG. Trends differed between individuals, including linearly increasing (Fig 5a,d), decreasing (Fig 5b,e) or quadratic (Fig 5c,f) trends in average heart rate and RR interval, suggesting patient-specific modulation over the weeklong monitoring.

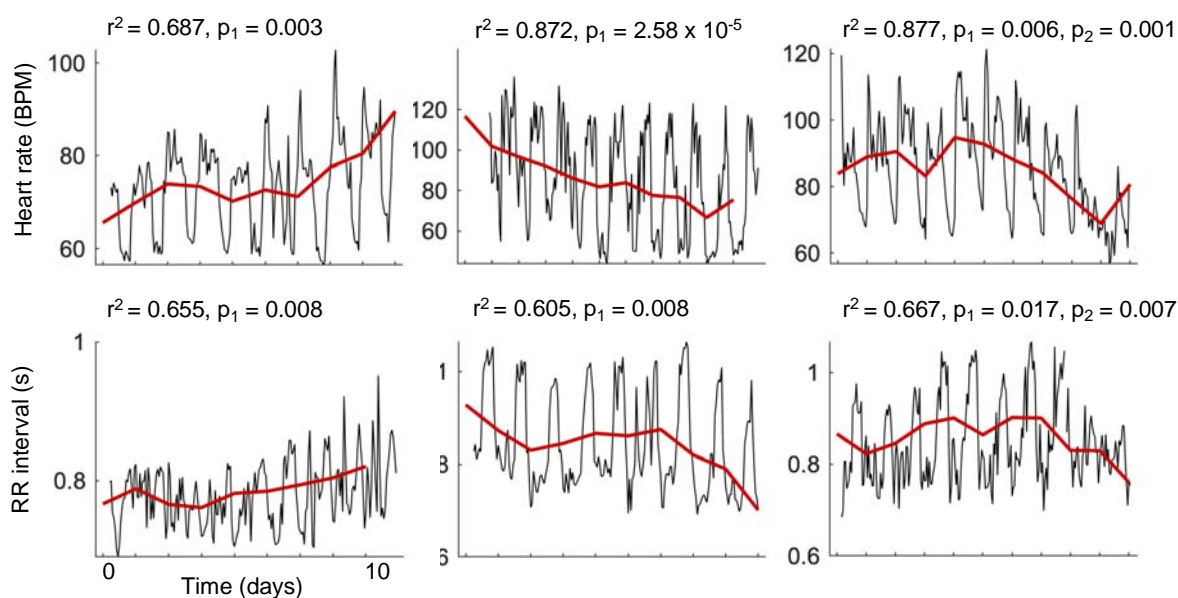

**Figure 5. Example weekly trends identified from ambulatory ECG monitoring.** Black lines show average heart rate (a-c) and RR interval (d-f) and red lines show smoothed data (1-day moving average). Significant trends were identified from the smoothed data using logistic regression. **a,d:** Increasing linear trends of heart rate and RR interval. **b,e:** Decreasing linear trends of heart rate and RR interval. **c,f:** Curved (quadratic) trends of heart rate and RR interval. Insets show  $r$ -squared values and  $p$ -values for the linear ( $p_1$ ) and quadratic ( $p_2$ ) components of the models.

Across the EEG-ECG cohort, linear or quadratic trends were found for average heart rate from 15 out of 29 (52%) studies, with 9 studies showing a significant ( $p < 0.05$ ) linear component and 11 showing a significant quadratic component. For RR interval, 14 out of 29 (48%) studies showed significant trends (10 linear and 5 quadratic). Exact  $p$ -values and  $R^2$  statistics for linear and quadratic models of heart rate and RR intervals are given in Supplementary Tables 3 and 4. Although it was not possible to determine whether these trends were associated with about-

weekly cycles, these findings support the observation that participants' average heart rates were modulated over weekly timescales.

In addition to weekly trends, we investigated co-modulation of circadian cycles of heart rate and RR intervals with epileptic events (see Appendix 3). Both epileptic activity and self-reported seizures were phase locked to 24-hour cycles of heart rate and RR intervals; however, this relationship could not be differentiated from the relationship between epileptic events and time of day (Supplementary Figure 4 and Supplementary Table 5).

## Discussion

The presented results reveal a new phenomenon of multiday cycles of heart rate in adults with epilepsy. Heart rate cycles were prevalent (100% of the cohort) and persisted over months, including during seizure free periods or in individuals with no reported seizures (see Supplementary Figure 2). It is therefore unlikely that seizure occurrence directly drives heart rate cycles, or vice versa; however, seizures preferentially occurred at particular phases of the heart rate cycle for most people (Fig 3), for both focal and generalised epilepsies. This phase relationship suggests heart rate cycles are co-modulated with already established multiday cycles of seizure likelihood<sup>4-6</sup>. Multiday heart rate cycles were common at weekly and monthly timescales (Fig 2). Cycle periods were unique to individuals, were not linked to a particular day of the week or clear environmental cues and showed similar distributions for men and women. Significant linear and nonlinear trends of heart rate were also found in 52% of people undergoing ambulatory EEG-ECG monitoring, validating the existence of multiday heart rate cycles found in the Tracking Seizure Cycles cohort (Fig 5). Understanding the relationship between cycles of epileptic activity and heart rate has the potential to shed light on underlying mechanisms of multiday physiological rhythms with clinical applications for both neurological and cardiovascular diseases.

### Mechanisms of multiday cycles in the heart and brain

Multiday cycles of epileptic activity are well documented,<sup>24</sup> and have been related to a progressive loss of resilience as the brain approaches a tipping point,<sup>6</sup> corresponding to an increased susceptibility to seizures. Multiday heart rate cycles showed strikingly similar features to these cycles of epileptic brain activity, with a clear preference for seizures to occur on the rising phase of heart rate cycles (Fig 4), which is also a property of epileptic rhythms.<sup>5,6</sup> This relationship suggests that increasing heart rate is linked to increased seizure likelihood. In line with this, VNS treatment is generally found to decrease heart rate, albeit on a shorter time scale,<sup>25</sup> consistent with cycle periods where seizures were also less likely. More generally, increased heart rate is associated with increased sympathetic dominance, which has also been linked to epilepsy.<sup>26</sup> Nevertheless, the current study cannot elucidate whether co-modulated

cycles of heart rate and seizures are causally linked or reflect two independent, correlated physiologies.

In contrast to epileptology, the existence of multiday cycles of heart rate has not been widely described in the cardiology literature, although some previous studies have documented weekly rhythms. One study of 86 premature infants found endogenous about-weekly (between 5-10 days) rhythms of either heart rate or blood pressure for 100% of the cohort (monitoring over 14-45 days).<sup>16</sup> Other studies in adults have suggested 7-day modulation governs heart rate and blood pressure,<sup>15,27</sup> although these have been predominately limited to weeklong recordings, which cannot convincingly demonstrate multiday periodicity. These previous studies suggest that heart rate cycles also exist for people without epilepsy. The current work builds on earlier results and highlights the importance of longer recording periods, which reveal heart rate cycles at multiple timescales, including weekly, fortnightly and monthly cycles (Fig 2).

The causal mechanisms of multiday epileptic rhythms or heart rate cycles are not understood. In epilepsy, both circadian and multiday rhythms show an endogenous component, with seminal studies in animal models<sup>10,28</sup> and human subjects under continuous dim-light conditions<sup>29</sup> revealing free-running circadian<sup>28,29</sup> and multiday cycles.<sup>5,9</sup> In the current study, participants maintained their usual day-to-day routines, although the lack of obvious environmental cues suggests multiday heart rate cycles also had some intrinsic biological drivers. However, there remains no clear explanation for the prevalence of brain/heart cycles with weekly or monthly periodicities.

Many candidate hormonal, metabolic and other environmental factors have been hypothesised to play some role in generating endogenous multiday cycles in humans.<sup>24,27</sup> Immune proteins are known to fluctuate with approximate weekly periodicity in humans, although the causes of this cycle are unknown.<sup>3</sup> Female sex hormones have been widely linked to monthly cycles of epileptic activity in women<sup>30</sup> and the menstrual cycle may also lead to changes in heart rate and HRV.<sup>31</sup> However, hormonal changes cannot explain the similar prevalence of monthly cycles of seizures in children and men,<sup>4,5,7</sup> nor the present results demonstrating monthly cycles of heart rate in male subjects (Fig 2c). Chronic stress can promote autonomic imbalance affecting both heart rate<sup>32</sup> and epileptic brain activity<sup>33</sup>, and stress is also perceived as one of the leading factors triggering seizures<sup>34</sup>. However, stress is not typically considered to follow regular, multiday cycles. In order to elucidate the drivers of co-modulated cardiac and epileptic activity, future studies should target a range of candidate mechanisms for long-term monitoring.

### Clinical applications

Heart rate cycles can provide a biomarker for individual seizure likelihood, which may be used to guide epilepsy therapy or in seizure forecasting systems. Seizure forecasting is considered a key goal of epilepsy treatment, restoring a degree of control to people with refractory seizures;

however, most forecasting algorithms have been deployed for intracranial EEG, which poses challenges for widespread availability of seizure warning systems.<sup>35</sup> Importantly, forecasting algorithms based on multiday cycles have emerged as the most accurate, recently surpassing all previous approaches on a benchmark human dataset<sup>6</sup> as well as showing excellent performance for larger cohorts,<sup>36</sup> and using data from seizure diaries.<sup>23</sup> If heart rate can be shown to reliably track multiday cycles of seizure likelihood, then similarly powerful seizure forecasts may eventually be derived from wearable devices.

In addition to seizure forecasting, monitoring heart rate cycles may provide insight into the long-term role of heart rate and HRV in risk of SUDEP. There are stereotypical cardiorespiratory changes prior to the occurrence of SUDEP<sup>37</sup>, with electrocardiographic abnormalities and impaired autonomic control associated with a higher risk of SUDEP.<sup>38</sup> Long-term ECG monitoring may be a predictive of SUDEP in people with epilepsy.<sup>39,40</sup> However, despite circadian modulation of SUDEP risk - with substantially higher incidence at night<sup>37</sup> - longer rhythms have not yet been investigated. The prevalence of co-modulated heart rate and seizure cycles makes heart rate cycles a feasible biomarker for the risk of both seizure occurrence and SUDEP.

Multiday heart rate cycles have implications for cardiology. The relevance of circadian cycles to cardiovascular disease has long been recognised. There is increased incidence of acute myocardial infarction and sudden cardiac death in the morning.<sup>41</sup> Ischemia and stroke also show a clear morning peak, related to circadian changes in blood pressure and cardiac output.<sup>42</sup> Circadian patterns are observed across most arrhythmic events regardless of whether an underlying heart condition is present.<sup>22</sup> In addition to circadian rhythms of cardiovascular disease, seven-day and seasonal patterns have been documented. Multiple studies show a Monday peak in cardiac mortality and hospital admissions for cardiovascular disease.<sup>17</sup> Although it is hypothesised that these weekly patterns may be related to endogenous variation in cardiac output,<sup>27</sup> they could also be linked to environmental factors.<sup>17</sup> Seasonal peaks of cardiac mortality and hospitalisation are generally observed in winter, primarily attributed to environmental factors.<sup>2</sup> The existence of endogenous weekly and other multiday heart rate cycles suggest that incidence of cardiovascular disease should be explored in relation to underlying individual cycle periods to investigate potential high-risk phases for common dysfunctions. Just as circadian regulation leads to danger times for people with heart conditions, it is possible that risk factors for cardiac mortality also fluctuate over multiday timescales.

#### Future work

The current study was based on self-reported seizure times, so noise or reporting bias could influence results. We had previously demonstrated that multiday cycles established from seizure diaries align with cycles recorded from true electrographic seizures.<sup>23</sup> Nevertheless, it will be critical to validate the co-modulation of heart rate cycles and epileptic activity using chronic



EEG recordings. Future work will extend these results to validate the existence of multiday heart rate cycles and their relationship to electrographic seizures using ultra long-term EEG and additional wearable physiological sensors. For now, it is our hope that the prospect of multiday cycles governing diverse physiological systems leads to new breakthroughs in understanding biological rhythms and treatment of disease.

## References

- 1 Manfredini R, Fabbian F, Pala M, *et al.* Seasonal and Weekly Patterns of Occurrence of Acute Cardiovascular Diseases: Does a Gender Difference Exist? *Journal of Women's Health* 2011; **20**: 1663–8.
- 2 Stewart S, Keates AK, Redfern A, McMurray JJV. Seasonal variations in cardiovascular disease. *Nature Reviews Cardiology* 2017; **14**: 654–64.
- 3 Haus E, Smolensky MH. Biologic rhythms in the immune system. *Chronobiology international* 1999; **16**: 581–622.
- 4 Karoly PJ, Goldenholz DM, Freestone DR, *et al.* Circadian and circaseptan rhythms in human epilepsy: a retrospective cohort study. *The Lancet Neurology* 2018; **17**: 977–85.
- 5 Baud MO, Kleen JK, Mirro EA, *et al.* Multi-day rhythms modulate seizure risk in epilepsy. *Nat Commun* 2018; **9**: 88.
- 6 Maturana MI, Meisel C, Dell K, *et al.* Critical slowing down as a biomarker for seizure susceptibility. *Nat Commun* 2020; **11**: 2172.
- 7 Griffiths G, Fox JT. Rhythm in epilepsy. *The Lancet* 1938; **232**: 409–16.
- 8 Karoly PJ, Freestone DR, Boston R, *et al.* Interictal spikes and epileptic seizures: their relationship and underlying rhythmicity. *Brain* 2016; **139**: 1066–78.
- 9 Gregg NM, Nasser M, Kremen V, *et al.* Circadian and multiday seizure periodicities, and seizure clusters in canine epilepsy. *Brain Communications* 2020; published online Feb 6. DOI:10.1093/braincomms/fcaa008.
- 10 Baud MO, Ghestem A, Benoliel J-J, Becker C, Bernard C. Endogenous multiday rhythm of epilepsy in rats. *Experimental Neurology* 2019; **315**: 82–7.
- 11 Wehr TA. Bipolar mood cycles associated with lunar entrainment of a circadian rhythm. *Translational Psychiatry* 2018; **8**: 1–6.
- 12 Ehlers CL, Frank E, Kupfer DJ. Social Zeitgebers and Biological Rhythms: A Unified Approach to Understanding the Etiology of Depression. *Arch Gen Psychiatry* 1988; **45**: 948–52.
- 13 Luce GG. Biological rhythms in psychiatry and medicine. US National Institute of Mental Health, 1970.
- 14 Rana S, Prabhu SD, Young ME. Chronobiological Influence Over Cardiovascular Function: The Good, the Bad, and the Ugly. *Circ Res* 2020; **126**: 258–79.

- 15 Siegelova J, Cornélissen G, Havelkova A, DUSEK J, VANK P, DOBSAK P. Seven-day ambulatory blood pressure monitoring: circadian and circaseptan rhythm in adults. *Noninvasive Methods of Cardiology, Masaryk University, Brno, Czech Republic* 2014; : 109–24.
- 16 Siegelova J, Cornelissen-Guillaume GG, Schwarzkopff O, Halberg F. Time structures in the development of children. *Neuroendocrinology Letters* 2003; **24**: 126–131.
- 17 Gallerani M, Pala M, Fedeli U. Circaseptan periodicity of cardiovascular diseases. *Heart failure clinics* 2017; **13**: 703–717.
- 18 Sevcencu C, Struijk JJ. Autonomic alterations and cardiac changes in epilepsy. *Epilepsia* 2010; **51**: 725–37.
- 19 Calandra-Buonaura G, Toschi N, Provini F, *et al.* Physiologic autonomic arousal heralds motor manifestations of seizures in nocturnal frontal lobe epilepsy: implications for pathophysiology. *Sleep medicine* 2012; **13**: 252–262.
- 20 Ben-Menachem E. Vagus-nerve stimulation for the treatment of epilepsy. *The Lancet Neurology* 2002; **1**: 477–82.
- 21 Henry TR. Therapeutic mechanisms of vagus nerve stimulation. *Neurology* 2002; **59**: S3–S14.
- 22 Black N, D’Souza A, Wang Y, *et al.* Circadian rhythm of cardiac electrophysiology, arrhythmogenesis, and the underlying mechanisms. *Heart Rhythm* 2019; **16**: 298–307.
- 23 Karoly PJ, Cook MJ, Maturana M, *et al.* Forecasting cycles of seizure likelihood. *Epilepsia* 2020; published online March 27. DOI:10.1111/epi.16485.
- 24 Karoly PJ, Rao VR, Worrell GA, *et al.* Cycles in Epilepsy. *Nature Reviews Neurology* 2020.
- 25 Yuan Y, Hassel JL, Doytchinova A, *et al.* Left cervical vagal nerve stimulation reduces skin sympathetic nerve activity in patients with drug resistant epilepsy. *Heart Rhythm* 2017; **14**: 1771–8.
- 26 Myers KA, Sivathamboo S, Perucca P. Heart rate variability measurement in epilepsy: How can we move from research to clinical practice? *Epilepsia* 2018; **59**: 2169–78.
- 27 Reinberg AE, Dejardin L, Smolensky MH, Touitou Y. Seven-day human biological rhythms: An expedition in search of their origin, synchronization, functional advantage, adaptive value and clinical relevance. *Chronobiology International* 2017; **34**: 162–91.
- 28 Quigg M, Clayburn H, Straume M, Menaker M, Bertram III EH. Effects of circadian regulation and rest—activity state on spontaneous seizures in a rat model of limbic epilepsy. *Epilepsia* 2000; **41**: 502–509.
- 29 Pavlova MK, Shea SA, Scheer FAJL, Bromfield EB. Is there a circadian variation of epileptiform abnormalities in idiopathic generalized epilepsy? *Epilepsy & Behavior* 2009; **16**: 461–7.
- 30 Herzog AG, Fowler KM, Sperling MR, Massaro JM, Progesterone Trial Study Group. Distribution of seizures across the menstrual cycle in women with epilepsy. *Epilepsia* 2015; **56**: e58–62.
- 31 Tenan MS, Brothers RM, Tweedell AJ, Hackney AC, Griffin L. Changes in resting heart rate variability across the menstrual cycle. *Psychophysiology* 2014; **51**: 996–1004.

- 32 Grippo AJ, Johnson AK. Stress, depression and cardiovascular dysregulation: a review of neurobiological mechanisms and the integration of research from preclinical disease models. *Stress* 2009; **12**: 1–21.
- 33 Van Campen JS, Hompe EL, Jansen FE, *et al.* Cortisol fluctuations relate to interictal epileptiform discharges in stress sensitive epilepsy. *Brain* 2016; **139**: 1673–9.
- 34 Haut SR, Vouyiouklis M, Shinnar S. Stress and epilepsy: a patient perception survey. *Epilepsy & Behavior* 2003; **4**: 511–4.
- 35 Stirling RE, Cook MJ, Grayden DB, Karoly PJ. Seizure forecasting and cyclic control of seizures. *Epilepsia* 2020.
- 36 Proix T, Truccolo W, Leguia MG, King-Stephens D, Rao VR, Baud MO. Forecasting Seizure Risk over Days. *MedRxiv*, 2019 DOI:10.1101/19008086.
- 37 Ryvlin P, Nashef L, Lhatoo SD, *et al.* Incidence and mechanisms of cardiorespiratory arrests in epilepsy monitoring units (MORTEMUS): a retrospective study. *The Lancet Neurology* 2013; **12**: 966–77.
- 38 Massey CA, Sowers LP, Dlouhy BJ, Richerson GB. Mechanisms of sudden unexpected death in epilepsy: the pathway to prevention. *Nat Rev Neurol* 2014; **10**: 271–82.
- 39 Galli A, Lombardi F. Heart rate variability regression and risk of sudden unexpected death in epilepsy. *Medical Hypotheses* 2017; **99**: 49–52.
- 40 Rugg-Gunn FJ, Simister RJ, Squirrell M, Holdright DR, Duncan JS. Cardiac arrhythmias in focal epilepsy: a prospective long-term study. *The Lancet* 2004; **364**: 2212–9.
- 41 Cohen MC, Rohtla KM, Lavery CE, Muller JE, Mittleman MA. Meta-analysis of the morning excess of acute myocardial infarction and sudden cardiac death. *American Journal of Cardiology* 1997; **79**: 1512–6.
- 42 Marler JR, Price TR, Clark GL, *et al.* Morning increase in onset of ischemic stroke. *Stroke* 1989; **20**: 473–6.
- 43 Nicolau GY, Haus E, Popescu M, Sackett-Lundeen L, Petrescu E. Circadian, Weekly, and Seasonal Variations in Cardiac Mortality, Blood Pressure, and Catecholamine Excretion. *Chronobiology international* 1991; **8**: 149–159.

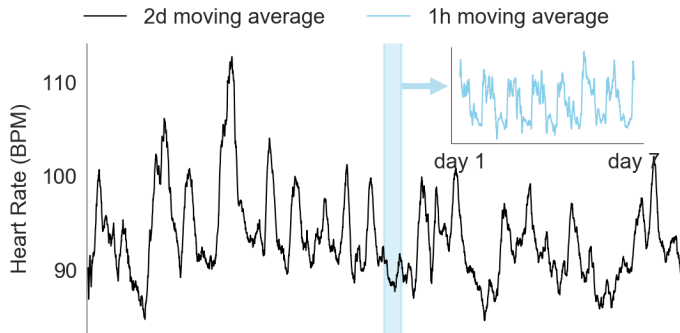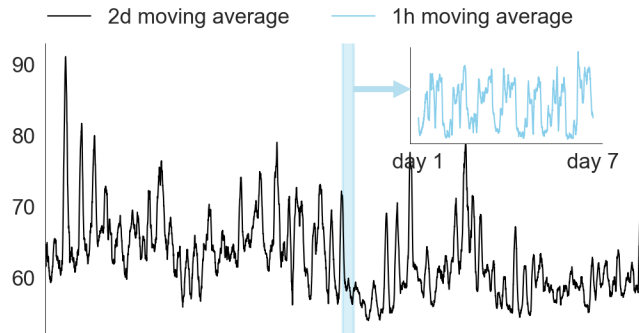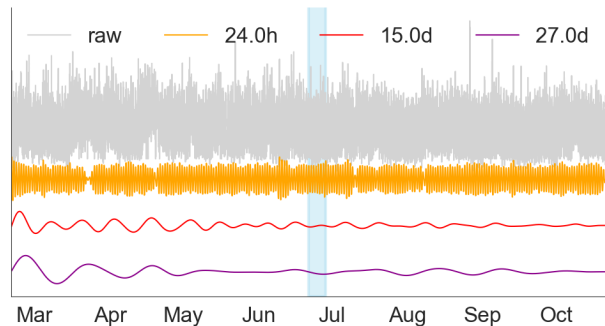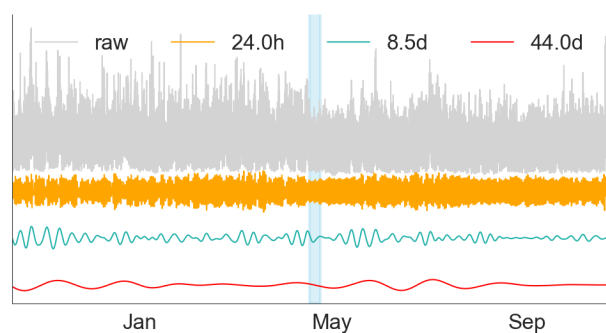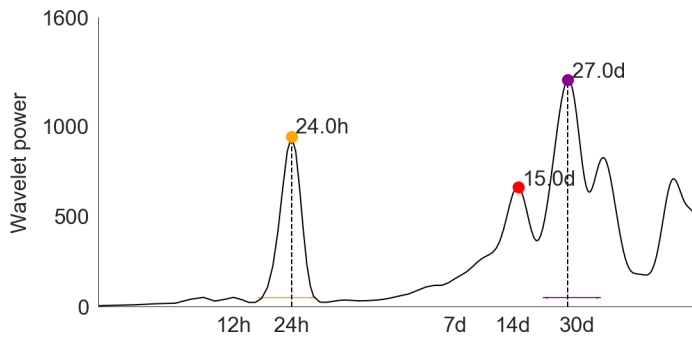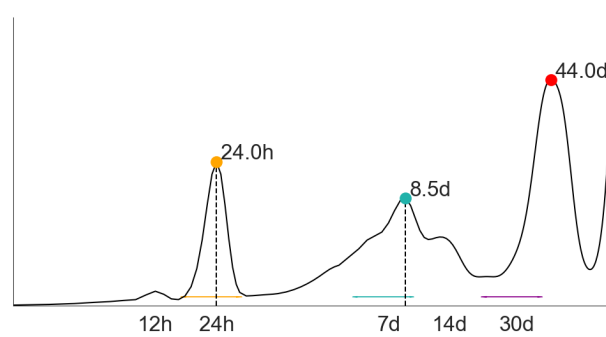

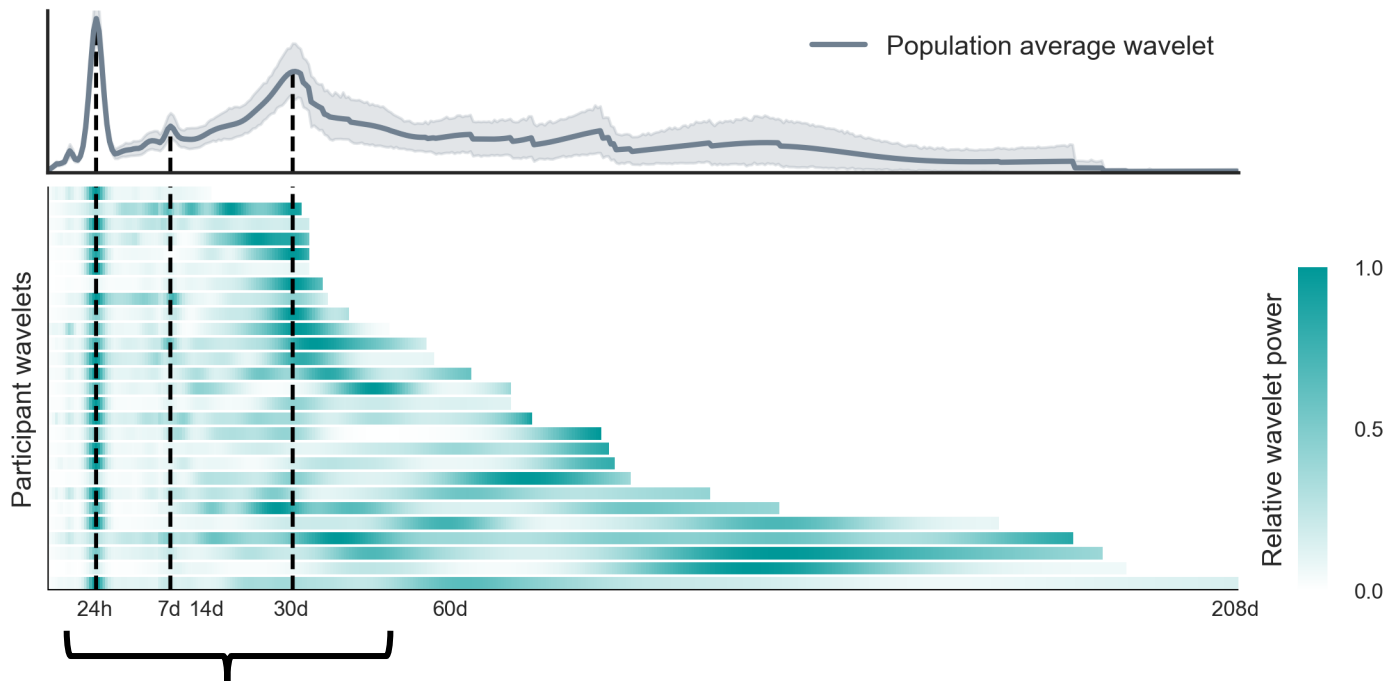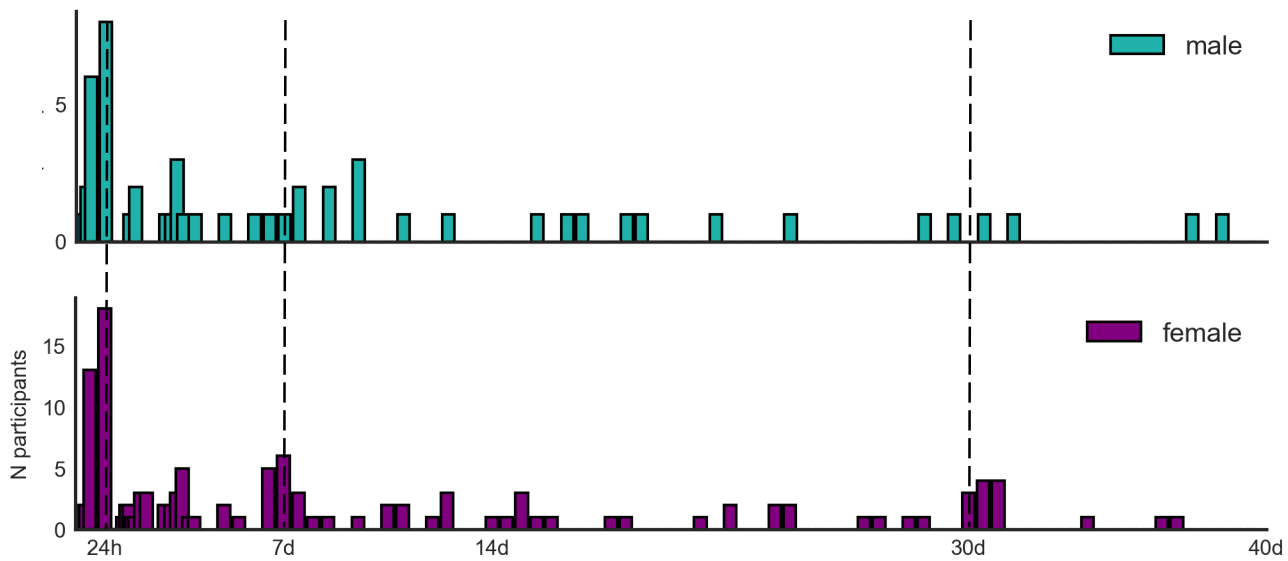

### Circadian (24 h) cycle

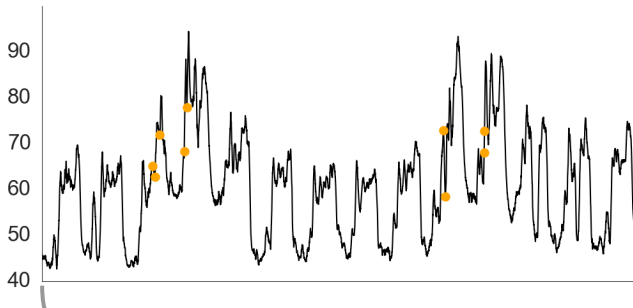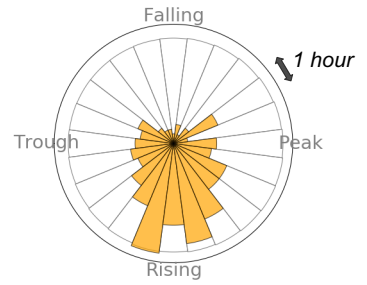

### About-weekly (8.5 d) cycle

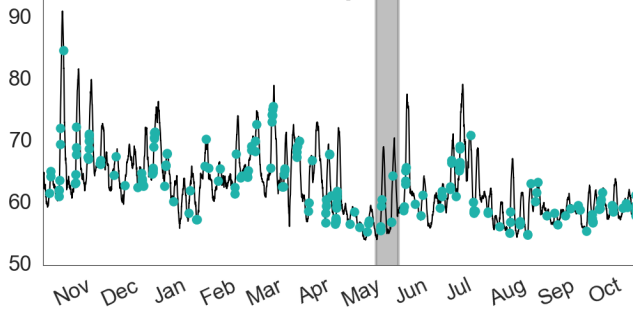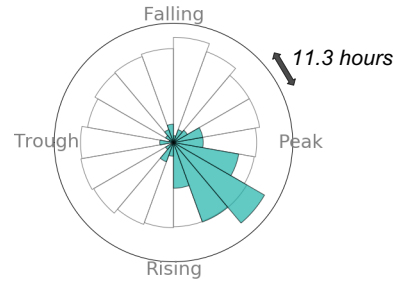

### Multiday (15 d) cycle

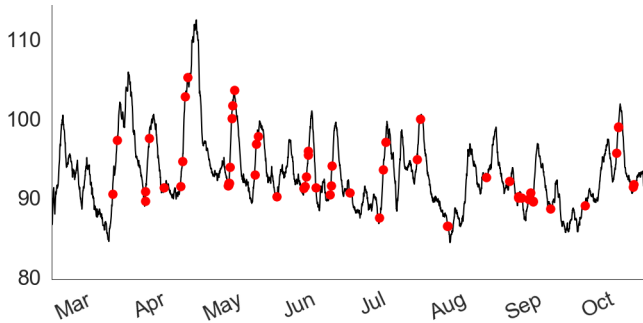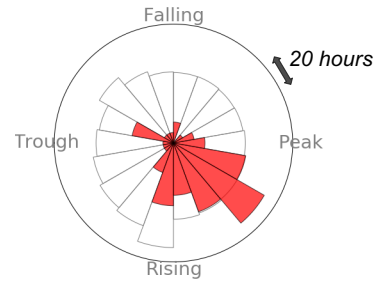

### About-monthly (27 d) cycle

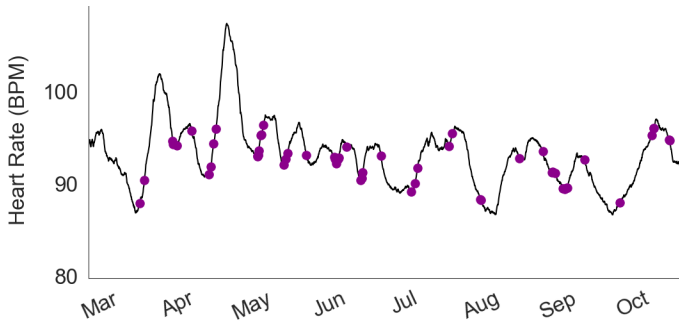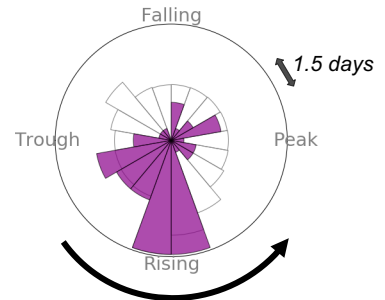

### Circadian

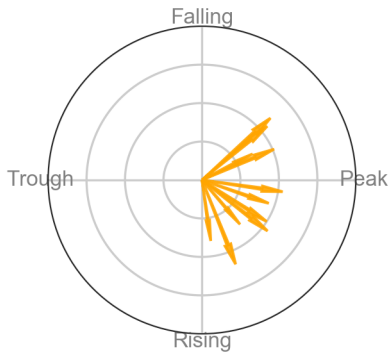

### Weekly

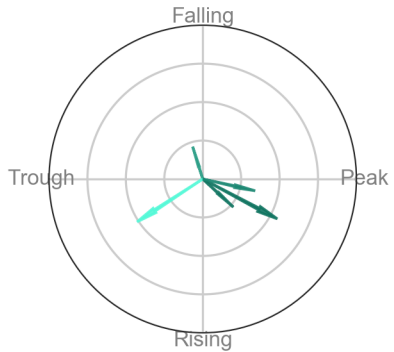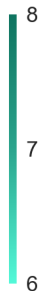

### Monthly

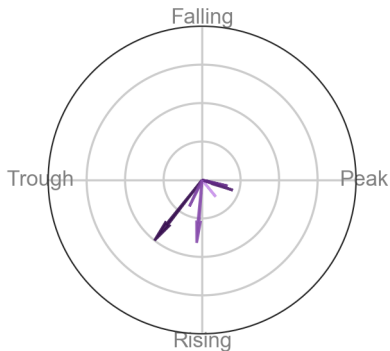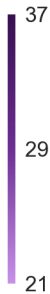

### Multiday

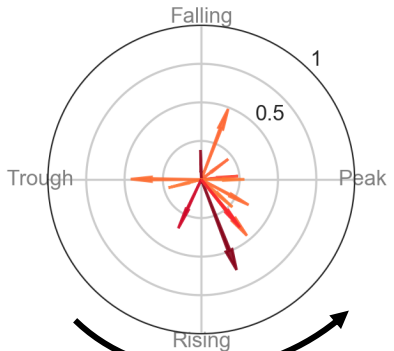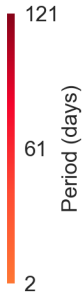

Period (days)

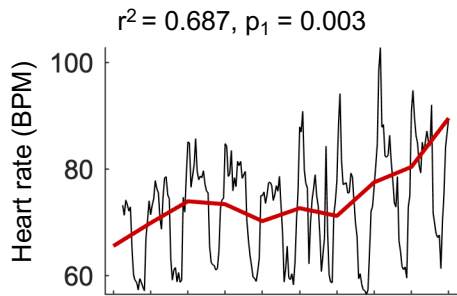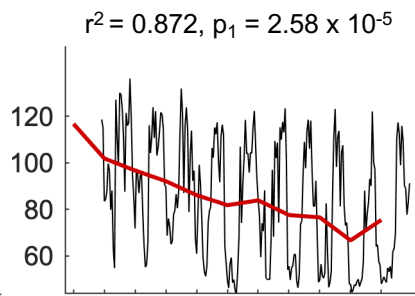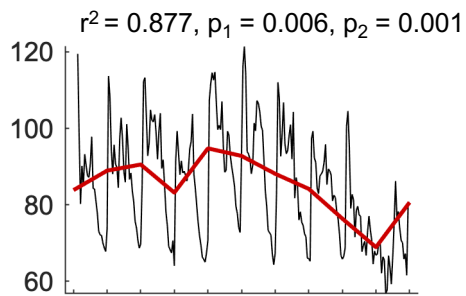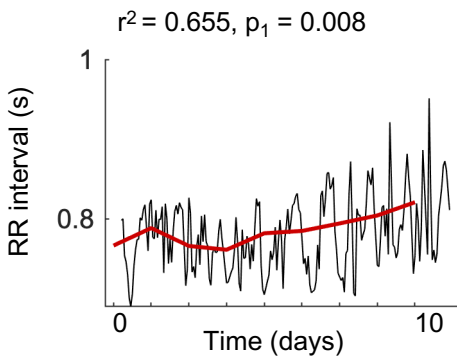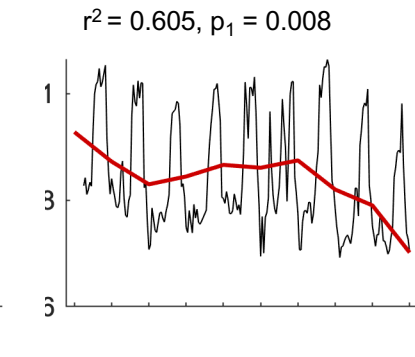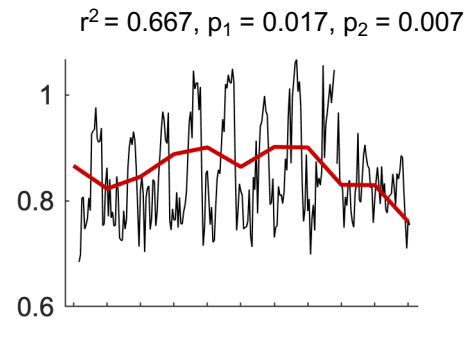

Source: https://medrxiv.org/content/medrxiv/early/2020/11/28/2020.11.24.20237990.full.pdf
